# Supplementary material for: Increased risk of multiple sclerosis relapse after in vitro fertilisation
Source: HighWire-hosted journal article supplement (doi:10.1136/jnnp-2012-302235), 2012-06-11
Supplement: jnnp-2012-302235-s1.pdf [file jnnp-2012-302235-s1.pdf]

**Supplementary Table 1:** Comparisons of the ARR between the different time periods (two months and six months) in the whole cohort (n=32, 70 IVF procedures), the patients treated either by GnRH agonists (48 IVF procedures) or antagonists for ovarian desensitization (19 IVF procedures), and in IVF followed either by a pregnancy (success of IVF: 21 procedures) or not (failure of IVF: 49 procedures). Wilcoxon paired tests were used for comparisons.

|                                                                           |                | ARR Period before IVF (1) |        | ARR period following IVF (2) |        | ARR Control period (3) |        | P-value (1/2) | P-value (2/3) |
|---------------------------------------------------------------------------|----------------|---------------------------|--------|------------------------------|--------|------------------------|--------|---------------|---------------|
|                                                                           |                | Mean                      | Median | Mean                         | Median | Mean                   | Median |               |               |
| <b>Whole cohort</b><br>(number of IVF procedures)                         | 2 month period | 0.77<br>(70)              | 0      | 1.71<br>(70)                 | 0      | 0.74<br>(65)           | 0      | <b>0.023</b>  | 0.062         |
|                                                                           | 6 month period | 0.83<br>(70)              | 0      | 1.15<br>(68)                 | 0      | 0.92<br>(65)           | 0      | 0.126         | 0.556         |
| <b>Cohort treated with GnRH agonists</b><br>(number of IVF procedures)    | 2 month period | 0.75<br>(48)              | 0      | 2.12<br>(48)                 | 0      | 0.80<br>(45)           | 0      | <b>0.012</b>  | <b>0.026</b>  |
|                                                                           | 6 month period | 0.83<br>(48)              | 0      | 0.98<br>(47)                 | 0      | 0.98<br>(45)           | 0      | 0.591         | 0.864         |
| <b>Cohort treated with GnRH antagonists</b><br>(number of IVF procedures) | 2 month period | 0.95<br>(19)              | 0      | 0.32<br>(19)                 | 0      | 0.63<br>(19)           | 0      | 0.35          | 0.750         |
|                                                                           | 6 month period | 0.63<br>(19)              | 0      | 1.16<br>(19)                 | 0      | 0.74<br>(19)           | 0      | 0.28          | 0.31          |
| <b>Success of IVF</b><br>(number of IVF procedures)                       | 2 month period | 0.57<br>(21)              | 0      | 0.86<br>(21)                 | 0      | 0.29<br>(21)           | 0      | 0.77          | 0.43          |
|                                                                           | 6 month period | 0.48<br>(21)              | 0      | 0.57<br>(21)                 | 0      | 0.76<br>(21)           | 0      | 0.78          | 0.56          |
| <b>Failure of IVF</b><br>(number of IVF procedures)                       | 2 month period | 0.86<br>(49)              | 0      | 2.08<br>(49)                 | 0      | 0.95<br>(44)           | 0      | <b>0.026</b>  | 0.112         |
|                                                                           | 6 month period | 0.98<br>(49)              | 0      | 1.36<br>(47)                 | 0      | 1.04<br>(44)           | 0      | 0.171         | 0.507         |

**Supplementary Table 2A:** Differences between the number of relapses during the two month-period before and after IVF. The difference between the number of relapses before and after IVF during a two month period was significant (p=0.001) regardless of the age at IVF, the disease duration at IVF and the type of recruitment. (\*) The coefficients represent the mean differences in the logarithm of the number of relapse according to each covariate.

|                                             | Regression coefficient (*) | Standard Error | p-value      |
|---------------------------------------------|----------------------------|----------------|--------------|
| <b>Intercept</b>                            | -4.87                      | 2.01           | 0.018        |
| <b>Two month-period before vs after IVF</b> | 0.80                       | 0.22           | <b>0.001</b> |
| <b>Age at IVF (yrs)</b>                     | 0.08                       | 0.06           | 0.214        |
| <b>Disease duration (yrs)</b>               | -0.05                      | 0.05           | 0.332        |
| <b>Type of recruitment</b>                  | -0.05                      | 0.47           | 0.923        |

**Supplementary Table 2B:** Differences between the number of relapses during the two month-period after IVF and a control period one year before IVF. The difference between the number of relapses after IVF and during the control period was significant ( $p=0.004$ ) regardless of the age at IVF, the disease duration at IVF and the type of recruitment. (\*) The coefficients represent the mean differences in the logarithm of the number of relapse according to each covariate.

|                                                     | <b>Regression coefficient (*)</b> | <b>Standard Error</b> | <b>p-value</b> |
|-----------------------------------------------------|-----------------------------------|-----------------------|----------------|
| <b>Intercept</b>                                    | -1.86                             | 1.90                  | 0.330          |
| <b>Two month-period after IVF vs control period</b> | 0.77                              | 0.26                  | <b>0.004</b>   |
| <b>Age at IVF (yrs)</b>                             | 0.01                              | 0.06                  | 0.916          |
| <b>Disease duration (yrs)</b>                       | -0.08                             | 0.05                  | 0.073          |
| <b>Type of recruitment</b>                          | -0.34                             | 0.42                  | 0.421          |

**Supplementary Table 3A:** Differences between the number of relapses during the six month-period before and after IVF. The difference between the number of relapses before and after IVF was no longer significant ( $p=0.101$ ). (\*) The coefficients represent the mean differences in the logarithm of the number of relapse according to each covariate.

|                                             | <b>Regression coefficient (*)</b> | <b>Standard Error</b> | <b>p-value</b> |
|---------------------------------------------|-----------------------------------|-----------------------|----------------|
| <b>Intercept</b>                            | -2.72                             | 1.49                  | 0.073          |
| <b>Six month-period before vs after IVF</b> | 0.35                              | 0.21                  | 0.101          |
| <b>Age at IVF (yrs)</b>                     | 0.06                              | 0.05                  | 0.182          |
| <b>Disease duration (yrs)</b>               | -0.03                             | 0.04                  | 0.367          |
| <b>Type of recruitment</b>                  | -0.21                             | 0.34                  | 0.555          |

**Supplementary Table 3B:** Differences between the number of relapses during the six month-period after IVF and a control period one year before IVF. The difference between the number of relapses after IVF and during the control period was no longer significant ( $p=0.381$ ). (\*) The coefficients represent the mean differences in the logarithm of the number of relapse according to each covariate.

|                                                      | <b>Regression coefficient (*)</b> | <b>Standard Error</b> | <b>p-value</b> |
|------------------------------------------------------|-----------------------------------|-----------------------|----------------|
| <b>Intercept</b>                                     | -2.09                             | 1.15                  | 0.074          |
| <b>Six month-period before IVF vs control period</b> | 0.18                              | 0.20                  | 0.381          |
| <b>Age at IVF (yrs)</b>                              | 0.06                              | 0.04                  | 0.127          |
| <b>Disease duration (yrs)</b>                        | -0.04                             | 0.03                  | 0.177          |
| <b>Type of recruitment</b>                           | -0.43                             | 0.26                  | 0.116          |
